# Supplementary material for: Prevalence and Trends of Basic Activities of Daily Living Limitations in Middle-Aged and Older Adults in the United States
Source: MDPI journal article supplement (doi:10.3390/epidemiologia4040040), 2023-11-09
Supplement: s1 [file s1]

**Supplementary Table S1.** Results of trends analyses for basic activities of daily living.

1

| Variables                | Estimate | 95% Confidence Interval | p-value |
|--------------------------|----------|-------------------------|---------|
| Overall Model            |          |                         |         |
| Intercept                | -1.40    | -1.40, -1.30            | <0.001  |
| Wave                     | -0.01    | -0.01, 0.01             | 0.52    |
| Age Model                |          |                         |         |
| Intercept                | -2.20    | -2.30, -2.10            | <0.001  |
| Wave                     | 0.04     | 0.03, 0.05              | <0.001  |
| Older                    | 1.06     | 0.90, 1.23              | <0.001  |
| Wave*Older               | -0.04    | -0.06, -0.03            | <0.001  |
| Gender Model             |          |                         |         |
| Intercept                | -1.20    | -1.3, -1.1              | <0.001  |
| Wave                     | -0.01    | -0.02, 0.01             | 0.11    |
| Male                     | -0.46    | -0.62, -0.30            | <0.001  |
| Wave*Male                | 0.01     | -0.01, 0.03             | 0.06    |
| Race and Ethnicity Model |          |                         |         |
| Intercept                | -1.40    | -1.50, -1.30            | <0.001  |
| Wave                     | -0.01    | -0.02, 0.01             | 0.07    |
| Hispanic                 | 0.55     | 0.30, 0.81              | <0.001  |
| Non-Hispanic Black       | 0.62     | 0.40, 0.84              | <0.001  |
| Non-Hispanic Other       | -0.05    | -0.52, 0.42             | 0.82    |
| Wave*Hispanic            | -0.01    | -0.04, 0.01             | 0.20    |
| Wave*Non-Hispanic Black  | -0.02    | -0.04, 0.01             | 0.06    |
| Wave*Non-Hispanic Other  | 0.01     | -0.03, 0.05             | 0.62    |

2
